# Supplementary material for: Quantitative Health Risk Assessment of the Chronic Inhalation of Chemical Compounds in Healthcare and Elderly Care Facilities
Source: MDPI journal article supplement (doi:10.3390/toxics10030141), 2022-03-15
Supplement: s1 [file s1]

# Supplementary Materials: Quantitative Health Risk Assessment of the Chronic Inhalation of Chemical Compounds in Healthcare and Elderly Care Facilities

Anaïs Colas, Alexandre Baudet, Pierre Le Cann, Olivier Blanchard, Jean-Pierre Gangneux, Estelle Baurès, and Arnaud Florentin

**Table S1.** Compounds of interest's toxicity from REACH regulation (inhalation) and selected VTR.

| Organic compound       | Acute toxicity                                        | Carcinogenicity                                       | Specific target organ toxicity                        | Selected TRVs (threshold/non-threshold effects)                                  |
|------------------------|-------------------------------------------------------|-------------------------------------------------------|-------------------------------------------------------|----------------------------------------------------------------------------------|
| <b>VOC</b>             |                                                       |                                                       |                                                       |                                                                                  |
| benzene                | data conclusive but not sufficient for classification | Carc. 1A                                              | hematopoietic system                                  | 10 µg/m <sup>3</sup> (ANSES)/2.6E-05 (µg/m <sup>3</sup> ) <sup>-1</sup> (ANSES)  |
| ethylbenzene           | Acute Tox. 4                                          | data conclusive but not sufficient for classification | hearing organs                                        | 1.5 µg/m <sup>3</sup> (ANSES)/2.5E-06 (µg/m <sup>3</sup> ) <sup>-1</sup> (OEHHA) |
| styrene                | Acute Tox. 4                                          | data conclusive but not sufficient for classification | nose, ear                                             | 860 µg/m <sup>3</sup> (ATSDR)/ -                                                 |
| toluene                | data conclusive but not sufficient for classification | -                                                     | neurologic                                            | 19000 µg/m <sup>3</sup> (ANSES)/ -                                               |
| o-xylene               | Acute Tox. 4                                          | data conclusive but not sufficient for classification | respiratory tract                                     | - / -                                                                            |
| mp-xylenes             | Acute Tox. 4                                          | data conclusive but not sufficient for classification | respiratory tract                                     | - / -                                                                            |
| 1,2,4-trimethylbenzene | Acute Tox. 4                                          | data conclusive but not sufficient for classification | respiratory tract                                     | 60 µg/m <sup>3</sup> (US EPA)/ -                                                 |
| naphthalene            | data conclusive but not sufficient for classification | Carc. 2                                               | data conclusive but not sufficient for classification | 37 µg/m <sup>3</sup> (ANSES)/5.6E-06 (µg/m <sup>3</sup> ) <sup>-1</sup> (ANSES)  |
| phenol                 | Acute Tox. 3                                          | data conclusive but not sufficient for classification | kidney, liver, skin, nervous system                   | 20 µg/m <sup>3</sup> (RIVM)/ -                                                   |
| n-decane               | data conclusive but not sufficient for classification | data conclusive but not sufficient for classification | data conclusive but not sufficient for classification | - / -                                                                            |
| n-undecane             | data conclusive but not sufficient for classification | data conclusive but not sufficient for classification | data conclusive but not sufficient for classification | - / -                                                                            |
| n-heptane              | data conclusive but not sufficient for classification | data conclusive but not sufficient for classification | central nervous system                                | 18400 µg/m <sup>3</sup> (RIVM)/ -                                                |
| 1,1,1-trichloroethane  | Acute Tox. 4                                          | data conclusive but not sufficient for classification | data conclusive but not sufficient for classification | 5000 µg/m <sup>3</sup> (OEHHA)/ -                                                |

|                      |                                                       |                                                       |                                                       |                                                                                         |
|----------------------|-------------------------------------------------------|-------------------------------------------------------|-------------------------------------------------------|-----------------------------------------------------------------------------------------|
| 1,4-dichlorobenzene  | data conclusive but not sufficient for classification | Carc. 2                                               | data conclusive but not sufficient for classification | 60 µg/m <sup>3</sup><br>(ATSDR)/1.1E-05<br>(µg/m <sup>3</sup> ) <sup>-1</sup> (OEHHA)   |
| trichloroethylene    | data conclusive but not sufficient for classification | Carc. 1B                                              | central nervous system                                | 2.2 µg/m <sup>3</sup><br>(ATSDR)/1.0E-06<br>(µg/m <sup>3</sup> ) <sup>-1</sup> (ANSES)  |
| tetrachloroethylene  | data conclusive but not sufficient for classification | Carc. 2                                               | data conclusive but not sufficient for classification | 400 µg/m <sup>3</sup><br>(ANSES)/2.6E-07<br>(µg/m <sup>3</sup> ) <sup>-1</sup> (ANSES)  |
| bromodichloromethane | -                                                     | -                                                     | -                                                     | - / -                                                                                   |
| tribromomethane      | Acute Tox. 3                                          | data conclusive but not sufficient for classification | data conclusive but not sufficient for classification | - /2.3E-05 (µg/m <sup>3</sup> ) <sup>-1</sup> (US EPA)                                  |
| trichloromethane     | Acute Tox. 4                                          | Carc. 2                                               | central nervous system, liver, kidneys                | 63 µg/m <sup>3</sup><br>(ANSES)/2.3E-05<br>(µg/m <sup>3</sup> ) <sup>-1</sup> (US EPA)  |
| 2-ethyl-1-hexanol    | Acute Tox. 4                                          | data conclusive but not sufficient for classification | respiratory tract                                     | 4 µg/m <sup>3</sup> (US EPA)/ -                                                         |
| ethanol              | data conclusive but not sufficient for classification | data conclusive but not sufficient for classification | data conclusive but not sufficient for classification | - / -                                                                                   |
| isopropanol          | data conclusive but not sufficient for classification | data conclusive but not sufficient for classification | may cause drowsiness or dizziness                     | 7000 µg/m <sup>3</sup> (OEHHA)/ -                                                       |
| n-propanol           | data conclusive but not sufficient for classification | -                                                     | may cause drowsiness or dizziness                     | - / -                                                                                   |
| acetone              | data conclusive but not sufficient for classification | data conclusive but not sufficient for classification | narcotic effects                                      | 30 µg/m <sup>3</sup> (ATSDR)/ -                                                         |
| 2-butanone           | data conclusive but not sufficient for classification | -                                                     | central nervous system (narcotic effects)             | 5000 µg/m <sup>3</sup> (US EPA)/ -                                                      |
| limonene             | data conclusive but not sufficient for classification | data conclusive but not sufficient for classification | data conclusive but not sufficient for classification | - / -                                                                                   |
| ether                | data conclusive but not sufficient for classification | -                                                     | may cause drowsiness or dizziness                     | - / -                                                                                   |
| 2-ethoxyethanol      | Acute Tox. 3                                          | data conclusive but not sufficient for classification | data conclusive but not sufficient for classification | 70 µg/m <sup>3</sup> (ANSES)/ -                                                         |
| 2-butoxyethanol      | data conclusive but not sufficient for classification | data conclusive but not sufficient for classification | data conclusive but not sufficient for classification | 1600 µg/m <sup>3</sup> (US EPA)/ -                                                      |
| formaldehyde         | Acute Tox. 3                                          | Carc. 1B                                              | data conclusive but not sufficient for classification | 123 µg/m <sup>3</sup><br>(ANSES)/1.3E-05<br>(µg/m <sup>3</sup> ) <sup>-1</sup> (US EPA) |
| acetaldehyde         | data conclusive but not sufficient for classification | Carc. 2                                               | respiratory tract                                     | 9 µg/m <sup>3</sup> (USEPA)/2.2E-06<br>(µg/m <sup>3</sup> ) <sup>-1</sup> (US EPA)      |
| propionaldehyde      | data conclusive but not sufficient for classification | data conclusive but not sufficient for classification | respiratory system                                    | 63 µg/m <sup>3</sup><br>(ANSES)/2.3E-05<br>(µg/m <sup>3</sup> ) <sup>-1</sup> (US EPA)  |

|                                   |                                                       |                                                       |                                                       |                                                        |
|-----------------------------------|-------------------------------------------------------|-------------------------------------------------------|-------------------------------------------------------|--------------------------------------------------------|
| butyraldehyde                     | data conclusive but not sufficient for classification | data conclusive but not sufficient for classification | data conclusive but not sufficient for classification | 8 µg/m <sup>3</sup> (US EPA)/-                         |
| isovaleraldehyde                  | data conclusive but not sufficient for classification | data conclusive but not sufficient for classification | may cause respiratory irritation.                     | - / -                                                  |
| valeraldehyde                     | data conclusive but not sufficient for classification | data conclusive but not sufficient for classification | may cause respiratory irritation.                     | - / -                                                  |
| hexaldehyde                       | -                                                     | -                                                     | -                                                     | - / -                                                  |
| <b>SVOC</b>                       |                                                       |                                                       |                                                       |                                                        |
| di(2-ethylhexyl) phthalate (DEHP) | data conclusive but not sufficient for classification | data conclusive but not sufficient for classification | data conclusive but not sufficient for classification | - /2.4E-06 (µg/m <sup>3</sup> ) <sup>-1</sup> (OEHHHA) |
| diethylphthalate (DEP)            | data conclusive but not sufficient for classification | data conclusive but not sufficient for classification | data conclusive but not sufficient for classification | - / -                                                  |
| dibutylphthalate (DBP)            | data conclusive but not sufficient for classification | data conclusive but not sufficient for classification | data conclusive but not sufficient for classification | - / -                                                  |
| diisobutylphthalate (DiBP)        | data conclusive but not sufficient for classification | data conclusive but not sufficient for classification | data conclusive but not sufficient for classification | - / -                                                  |
| benzylbutylphthalate (BBP)        | data conclusive but not sufficient for classification | data conclusive but not sufficient for classification | data conclusive but not sufficient for classification | - / -                                                  |
| diisononylphthalate (DiNP)        | data conclusive but not sufficient for classification | data conclusive but not sufficient for classification | data conclusive but not sufficient for classification | - / -                                                  |
| tonalide                          | data conclusive but not sufficient for classification | data conclusive but not sufficient for classification | data conclusive but not sufficient for classification | - / -                                                  |
| galaxolide                        | data conclusive but not sufficient for classification | data conclusive but not sufficient for classification | data conclusive but not sufficient for classification | - / -                                                  |
| cyfluthrine                       | -                                                     | -                                                     | -                                                     | - / -                                                  |
| cypermethrine                     | -                                                     | -                                                     | -                                                     | - / -                                                  |
| deltamethrine                     | -                                                     | -                                                     | -                                                     | - / -                                                  |
| permethrine                       | -                                                     | -                                                     | -                                                     | - / -                                                  |
| tetramethrine                     | -                                                     | -                                                     | -                                                     | - / -                                                  |

Notes: “-” indicates a data lacking

**Table S2.** Hazard quotients in healthcare and elderly care facilities.

|                       | Dental and general practitioner offices |                  |                      |                      | Nursing homes                  |                                |                         |            | Pharmacies          |                                                     | Hospitals         |                              |          |  |
|-----------------------|-----------------------------------------|------------------|----------------------|----------------------|--------------------------------|--------------------------------|-------------------------|------------|---------------------|-----------------------------------------------------|-------------------|------------------------------|----------|--|
|                       | Dental surgeon                          | Dental assistant | General practitioner | Nursing home's nurse | Nursing home's nurse assistant | Nursing home's physiotherapist | Nursing home's resident | Pharmacist | Pharmacy technician | Endoscope Disinfection Unit's Laboratory technician | Care unit's nurse | Anesthesia Care Unit's nurse |          |  |
| Aromatic hydrocarbons |                                         |                  |                      |                      |                                |                                |                         |            |                     |                                                     |                   |                              |          |  |
| Benzene               | 1.22E-02                                | 1.22E-02         | 1.19E-02             | 1.13E-02             | 1.46E-02                       | 1.28E-02                       | 3.30E-03                | 8.76E-03   | 9.55E-03            | 5.07E-03                                            | 5.04E-03          | 6.44E-03                     | 5.36E-03 |  |
| Ethylbenzene          | 2.41E-01                                | 1.92E-01         | 1.53E-02             | 2.85E-02             | 4.37E-02                       | 3.02E-02                       | 1.05E-02                | 4.46E-02   | 4.57E-02            | 1.17E-02                                            | 5.53E-02          | 8.84E-03                     | 1.12E-02 |  |
| Styrene               | 6.83E-05                                | 6.08E-05         | 2.13E-05             | 2.19E-05             | 3.05E-05                       | 2.41E-05                       | 7.09E-06                | 8.79E-05   | 9.54E-05            | 6.65E-06                                            | 1.81E-05          | 1.37E-05                     | 1.39E-05 |  |

|                          |          |          |          |          |          |          |          |          |          |          |          |          |          |
|--------------------------|----------|----------|----------|----------|----------|----------|----------|----------|----------|----------|----------|----------|----------|
| Toluene                  | 5.90E-06 | 5.69E-06 | 5.31E-06 | 5.66E-06 | 7.19E-06 | 6.39E-06 | 1.61E-06 | 9.95E-06 | 1.08E-05 | 5.18E-06 | 2.15E-05 | 4.26E-06 | 5.89E-06 |
| o-xylene                 | 1.84E-06 | 1.51E-06 | 4.91E-07 | 7.30E-07 | 1.20E-06 | 7.54E-07 | 2.97E-07 | 7.13E-07 | 7.80E-07 | 1.26E-07 | 1.63E-06 | 2.15E-07 | 2.91E-07 |
| mp-xylenes               | 4.63E-06 | 3.80E-06 | 9.12E-07 | 1.63E-06 | 2.76E-06 | 1.66E-06 | 6.86E-07 | 1.70E-06 | 1.84E-06 | 5.39E-07 | 4.63E-06 | 4.93E-07 | 6.78E-07 |
| 1,2,4-trimethylbenzene   | 6.77E-04 | 6.37E-04 | 5.35E-04 | 3.42E-04 | 5.10E-04 | 3.67E-04 | 1.22E-04 | 5.84E-04 | 6.61E-04 | 0.00E+00 | 0.00E+00 | 0.00E+00 | 0.00E+00 |
| Naphthalene              | 5.98E-04 | 6.00E-04 | 4.95E-04 | 4.65E-04 | 5.91E-04 | 5.25E-04 | 1.32E-04 | 3.49E-04 | 3.74E-04 | 1.28E-04 | 2.22E-04 | 1.99E-04 | 2.17E-04 |
| Phenol                   | 4.50E-03 | 4.31E-03 | 2.98E-03 | 2.83E-03 | 3.93E-03 | 3.11E-03 | 9.14E-04 | 2.86E-03 | 3.09E-03 | 6.04E-04 | 1.47E-03 | 1.37E-03 | 1.19E-03 |
| Aliphatic hydrocarbons   |          |          |          |          |          |          |          |          |          |          |          |          |          |
| n-decane                 | NC       |
| n-heptane                | 1.34E-06 | 1.32E-06 | 9.96E-07 | 1.26E-06 | 1.72E-06 | 1.39E-06 | 3.98E-07 | 1.35E-06 | 1.48E-06 | 2.82E-07 | 6.30E-07 | 3.09E-07 | 5.14E-07 |
| n-undecane               | NC       |
| Halogenated hydrocarbons |          |          |          |          |          |          |          |          |          |          |          |          |          |
| 1,1,1-Trichloroethane    | 9.92E-06 | 9.87E-06 | 1.10E-05 | 9.99E-06 | 1.22E-05 | 1.14E-05 | 2.70E-06 | 6.92E-06 | 7.52E-06 | 0.00E+00 | 0.00E+00 | 0.00E+00 | 0.00E+00 |
| 1,4-Dichlorobenzene      | 3.24E-04 | 3.32E-04 | 3.05E-04 | 2.87E-04 | 3.64E-04 | 3.24E-04 | 8.16E-05 | 2.15E-04 | 2.31E-04 | 0.00E+00 | 0.00E+00 | 0.00E+00 | 0.00E+00 |
| Trichloroethylene        | 8.85E-03 | 9.06E-03 | 8.33E-03 | 7.82E-03 | 9.94E-03 | 8.83E-03 | 2.23E-03 | 5.87E-03 | 6.29E-03 | 2.16E-03 | 3.74E-03 | 3.35E-03 | 3.65E-03 |
| Tetrachloroethylene      | 2.18E-04 | 2.04E-04 | 4.58E-05 | 4.30E-05 | 5.46E-05 | 4.86E-05 | 1.22E-05 | 2.46E-04 | 2.84E-04 | 1.19E-05 | 1.17E-05 | 1.84E-05 | 2.01E-05 |
| Trichloromethane         | 4.00E-04 | 4.19E-04 | 2.91E-04 | 2.73E-04 | 3.47E-04 | 3.08E-04 | 7.77E-05 | 2.42E-04 | 2.67E-04 | 7.54E-05 | 4.80E-04 | 1.23E-04 | 1.27E-04 |
| Dibromochloromethane     | NC       |
| Tribromomethane          | NC       |
| Alcohols                 |          |          |          |          |          |          |          |          |          |          |          |          |          |
| 2-ethyl-1-hexanol        | 1.87E-01 | 1.78E-01 | 1.23E-01 | 1.14E-01 | 1.45E-01 | 1.29E-01 | 3.24E-02 | 1.02E-01 | 1.08E-01 | 3.04E-02 | 5.07E-02 | 4.69E-02 | 5.11E-02 |
| Ethanol                  | 3.10E-04 | 3.32E-04 | 2.81E-04 | 2.80E-04 | 4.55E-04 | 2.90E-04 | 1.12E-04 | 2.06E-04 | 2.06E-04 | 4.94E-05 | 1.81E-04 | 2.09E-04 | 2.24E-04 |
| Isopropanol              | 5.32E-04 | 5.66E-04 | 5.32E-04 | 1.87E-04 | 2.86E-04 | 1.99E-04 | 6.87E-05 | 2.05E-04 | 2.17E-04 | 4.40E-05 | 2.05E-04 | 2.66E-04 | 1.90E-04 |
| n-propanol               | 2.54E-05 | 2.29E-05 | 1.26E-06 | 1.18E-06 | 1.50E-06 | 1.34E-06 | 3.37E-07 | 1.54E-06 | 1.62E-06 | 3.02E-07 | 1.63E-06 | 1.01E-06 | 6.07E-07 |
| Ketones                  |          |          |          |          |          |          |          |          |          |          |          |          |          |
| Acetone                  | 1.16E-01 | 1.27E-01 | 9.19E-02 | 4.44E-02 | 6.67E-02 | 4.75E-02 | 1.60E-02 | 4.52E-02 | 5.00E-02 | 1.56E-02 | 5.28E-02 | 3.33E-02 | 3.00E-02 |
| 2-Butanone               | 6.14E-05 | 7.08E-05 | 2.02E-05 | 1.89E-05 | 2.40E-05 | 2.14E-05 | 5.39E-06 | 1.52E-05 | 1.68E-05 | 0.00E+00 | 0.00E+00 | 0.00E+00 | 0.00E+00 |
| Terpenes                 |          |          |          |          |          |          |          |          |          |          |          |          |          |
| Limonene                 | NC       |
| Ethers                   |          |          |          |          |          |          |          |          |          |          |          |          |          |
| Ether                    | 9.19E-07 | 9.42E-07 | 1.01E-06 | 9.16E-07 | 1.12E-06 | 1.05E-06 | 2.48E-07 | 3.42E-06 | 2.59E-06 | 1.98E-06 | 3.09E-05 | 2.14E-06 | 7.36E-06 |
| 2-Ethoxyethanol          | 6.87E-03 | 6.90E-03 | 7.00E-03 | 6.51E-03 | 8.27E-03 | 7.35E-03 | 1.85E-03 | 4.97E-03 | 5.41E-03 | 0.00E+00 | 0.00E+00 | 0.00E+00 | 0.00E+00 |
| 2-Butoxyethanol          | 3.01E-04 | 3.02E-04 | 3.06E-04 | 2.88E-04 | 3.70E-04 | 3.24E-04 | 8.33E-05 | 2.18E-04 | 2.37E-04 | 0.00E+00 | 0.00E+00 | 0.00E+00 | 0.00E+00 |
| Aldehydes                |          |          |          |          |          |          |          |          |          |          |          |          |          |
| Formaldehyde             | 7.16E-03 | 7.07E-03 | 2.34E-02 | 7.30E-03 | 1.19E-02 | 7.58E-03 | 2.92E-03 | 1.04E-02 | 1.09E-02 | 1.05E-03 | 2.76E-03 | 1.78E-03 | 2.21E-03 |
| Acetaldehyde             | 7.46E-02 | 7.27E-02 | 6.52E-02 | 5.18E-02 | 7.05E-02 | 5.72E-02 | 1.63E-02 | 6.79E-02 | 7.17E-02 | 1.00E-02 | 4.33E-02 | 2.58E-02 | 2.53E-02 |
| Propionaldehyde          | 8.06E-03 | 8.22E-03 | 1.20E-02 | 7.73E-03 | 1.01E-02 | 8.66E-03 | 2.29E-03 | 1.20E-02 | 1.27E-02 | 6.31E-03 | 1.03E-02 | 9.67E-03 | 1.03E-02 |
| Butyraldehyde            | NC       |
| Isovaleraldehyde         | NC       |
| Valeraldehyde            | NC       |
| Hexaldehyde              | 4.10E-05 | 4.08E-05 | 1.06E-04 | 5.27E-05 | 7.01E-05 | 5.87E-05 | 1.60E-05 | 1.22E-04 | 1.29E-04 | 1.74E-05 | 3.17E-05 | 3.01E-05 | 3.00E-05 |
| Phthalates               |          |          |          |          |          |          |          |          |          |          |          |          |          |

|                                   |          |          |          |          |          |          |          |          |          |          |          |          |          |
|-----------------------------------|----------|----------|----------|----------|----------|----------|----------|----------|----------|----------|----------|----------|----------|
| di(2-ethyl hexyl)phthalate (DEHP) | NC       |
| Diethylphthalate (DEP)            | 4.53E-06 | 4.58E-06 | 2.08E-05 | 1.33E-05 | 2.34E-05 | 1.34E-05 | 5.88E-06 | 5.56E-06 | 6.29E-06 | 6.64E-07 | 2.96E-06 | 2.68E-06 | 3.04E-06 |
| Dibutylphthalate (DBP)            | 2.02E-04 | 2.01E-04 | 5.78E-04 | 3.58E-04 | 5.50E-04 | 3.79E-04 | 1.33E-04 | 2.17E-04 | 2.47E-04 | 1.30E-04 | 2.43E-04 | 1.62E-04 | 1.52E-04 |
| Diisobutylphthalate (DiBP)        | 3.92E-05 | 3.93E-05 | 3.98E-05 | 4.02E-05 | 6.52E-05 | 4.18E-05 | 1.60E-05 | 2.18E-05 | 2.34E-05 | 1.50E-05 | 2.44E-05 | 4.24E-05 | 1.48E-05 |
| Benzylbutylphthalate (BBP)        | 1.22E-06 | 1.38E-06 | 8.93E-06 | 1.90E-06 | 2.42E-06 | 2.15E-06 | 5.41E-07 | 1.37E-06 | 1.48E-06 | 5.53E-07 | 9.13E-07 | 8.52E-07 | 9.13E-07 |
| Diisononylphthalate (DiNP)        | 1.31E-07 | 1.46E-07 | 2.83E-07 | 1.17E-07 | 1.65E-07 | 1.28E-07 | 3.86E-08 | 7.16E-08 | 7.62E-08 | 2.82E-08 | 4.66E-08 | 4.35E-08 | 4.66E-08 |
| Musks                             |          |          |          |          |          |          |          |          |          |          |          |          |          |
| Tonalide (AHTN)                   | 3.17E-05 | 3.56E-05 | 5.50E-05 | 4.44E-05 | 6.16E-05 | 4.88E-05 | 1.43E-05 | 1.24E-04 | 1.52E-04 | 0.00E+00 | 2.56E-05 | 2.29E-05 | 9.04E-06 |
| Galaxolide (HHCB)                 | 1.76E-06 | 1.64E-06 | 8.36E-06 | 2.91E-06 | 4.17E-06 | 3.17E-06 | 9.81E-07 | 5.31E-06 | 6.32E-06 | 2.16E-07 | 1.65E-06 | 1.52E-06 | 9.71E-07 |
| Pyrethrinoides                    |          |          |          |          |          |          |          |          |          |          |          |          |          |
| Cyfluthrine                       | NC       |
| Cypermethrine                     | NC       |
| Deltamethrine                     | NC       |
| Permethrine                       | NC       |
| Tetramethrine                     | NC       |

Notes: Orange values indicates hazard quotients greater than 0.1; NC indicates that the hazard quotient was not calculated due to the absence of TRV and DNEL for chronic inhalation.

**Table S3.** Excess lifetime cancer risk in healthcare and elderly care facilities.

|                          | Dental and general practitioner offices |                  |                      |                      | Nursing homes                  |                                |                         |            | Pharmacies          |                               | Hospitals             |                   |                              |  |
|--------------------------|-----------------------------------------|------------------|----------------------|----------------------|--------------------------------|--------------------------------|-------------------------|------------|---------------------|-------------------------------|-----------------------|-------------------|------------------------------|--|
|                          | Dental surgeon                          | Dental assistant | General practitioner | Nursing home's nurse | Nursing home's nurse assistant | Nursing home's physiotherapist | Nursing home's resident | Pharmacist | Pharmacy technician | Endoscope Disinfection Unit's | Laboratory technician | Care unit's nurse | Anesthesia Care Unit's nurse |  |
| Aromatic hydrocarbons    |                                         |                  |                      |                      |                                |                                |                         |            |                     |                               |                       |                   |                              |  |
| Benzene                  | 3,16E-06                                | 3,18E-06         | 3,10E-06             | 2,95E-06             | 3,81E-06                       | 3,32E-06                       | 8,59E-07                | 2,28E-06   | 2,48E-06            | 1,32E-06                      | 1,31E-06              | 1,67E-06          | 1,39E-06                     |  |
| Ethylbenzene             | 9,05E-07                                | 7,20E-07         | 5,73E-08             | 1,07E-07             | 1,64E-07                       | 1,13E-07                       | 3,95E-08                | 1,67E-07   | 1,71E-07            | 4,37E-08                      | 2,07E-07              | 3,31E-08          | 4,19E-08                     |  |
| Styrene                  | NC                                      | NC               | NC                   | NC                   | NC                             | NC                             | NC                      | NC         | NC                  | NC                            | NC                    | NC                | NC                           |  |
| Toluene                  | NC                                      | NC               | NC                   | NC                   | NC                             | NC                             | NC                      | NC         | NC                  | NC                            | NC                    | NC                | NC                           |  |
| o-xylene                 | NC                                      | NC               | NC                   | NC                   | NC                             | NC                             | NC                      | NC         | NC                  | NC                            | NC                    | NC                | NC                           |  |
| mp-xylenes               | NC                                      | NC               | NC                   | NC                   | NC                             | NC                             | NC                      | NC         | NC                  | NC                            | NC                    | NC                | NC                           |  |
| 1,2,4-trimethylbenzene   | NC                                      | NC               | NC                   | NC                   | NC                             | NC                             | NC                      | NC         | NC                  | NC                            | NC                    | NC                | NC                           |  |
| Naphthalene              | 1,24E-07                                | 1,24E-07         | 1,03E-07             | 9,63E-08             | 1,22E-07                       | 1,09E-07                       | 2,74E-08                | 7,23E-08   | 7,75E-08            | 2,66E-08                      | 4,61E-08              | 4,13E-08          | 4,50E-08                     |  |
| Phenol                   | NC                                      | NC               | NC                   | NC                   | NC                             | NC                             | NC                      | NC         | NC                  | NC                            | NC                    | NC                | NC                           |  |
| Aliphatic hydrocarbons   |                                         |                  |                      |                      |                                |                                |                         |            |                     |                               |                       |                   |                              |  |
| n-decane                 | NC                                      | NC               | NC                   | NC                   | NC                             | NC                             | NC                      | NC         | NC                  | NC                            | NC                    | NC                | NC                           |  |
| n-heptane                | NC                                      | NC               | NC                   | NC                   | NC                             | NC                             | NC                      | NC         | NC                  | NC                            | NC                    | NC                | NC                           |  |
| n-undecane               | NC                                      | NC               | NC                   | NC                   | NC                             | NC                             | NC                      | NC         | NC                  | NC                            | NC                    | NC                | NC                           |  |
| Halogenated hydrocarbons |                                         |                  |                      |                      |                                |                                |                         |            |                     |                               |                       |                   |                              |  |
| 1,1,1-Trichloroethane    | NC                                      | NC               | NC                   | NC                   | NC                             | NC                             | NC                      | NC         | NC                  | NC                            | NC                    | NC                | NC                           |  |
| 1,4-Dichlorobenzene      | 2,14E-07                                | 2,19E-07         | 2,02E-07             | 1,89E-07             | 2,40E-07                       | 2,14E-07                       | 5,39E-08                | 1,42E-07   | 1,52E-07            | 0,00E+00                      | 0,00E+00              | 0,00E+00          | 0,00E+00                     |  |

|                                      |          |          |          |          |          |          |          |          |          |          |          |          |          |
|--------------------------------------|----------|----------|----------|----------|----------|----------|----------|----------|----------|----------|----------|----------|----------|
| Trichloroethylene                    | 1,95E-08 | 1,99E-08 | 1,83E-08 | 1,72E-08 | 2,19E-08 | 1,94E-08 | 4,90E-09 | 1,29E-08 | 1,38E-08 | 4,75E-09 | 8,22E-09 | 7,37E-09 | 8,03E-09 |
| Tetrachloroethylene                  | 2,27E-08 | 2,12E-08 | 4,77E-09 | 4,47E-09 | 5,68E-09 | 5,05E-09 | 1,27E-09 | 2,55E-08 | 2,96E-08 | 1,23E-09 | 1,21E-09 | 1,92E-09 | 2,09E-09 |
| Trichloromethane                     | 5,80E-07 | 6,07E-07 | 4,22E-07 | 3,96E-07 | 5,03E-07 | 4,47E-07 | 1,13E-07 | 3,50E-07 | 3,87E-07 | 1,09E-07 | 6,96E-07 | 1,78E-07 | 1,85E-07 |
| Dibromochloromethane                 | NC       |
| Tribromomethane                      | 2,14E-08 | 2,19E-08 | 2,02E-08 | 1,89E-08 | 2,40E-08 | 2,14E-08 | 5,39E-09 | 1,42E-08 | 1,52E-08 | 5,22E-09 | 9,05E-09 | 8,11E-09 | 8,83E-09 |
| Alcohols                             |          |          |          |          |          |          |          |          |          |          |          |          |          |
| 2-ethyl-1-hexanol                    | NC       |
| Ethanol                              | NC       |
| Isopropanol                          | NC       |
| n-propanol                           | NC       |
| Ketones                              |          |          |          |          |          |          |          |          |          |          |          |          |          |
| Acetone                              | NC       |
| 2-Butanone                           | NC       |
| Terpenes                             |          |          |          |          |          |          |          |          |          |          |          |          |          |
| Limonene                             | NC       |
| Ethers                               |          |          |          |          |          |          |          |          |          |          |          |          |          |
| Ether                                | NC       |
| 2-Ethoxyethanol                      | NC       |
| 2-Butoxyethanol                      | NC       |
| Aldehydes                            |          |          |          |          |          |          |          |          |          |          |          |          |          |
| Formaldehyde                         | 1,15E-05 | 1,13E-05 | 3,75E-05 | 1,17E-05 | 1,90E-05 | 1,21E-05 | 4,66E-06 | 1,67E-05 | 1,75E-05 | 1,67E-06 | 4,41E-06 | 2,85E-06 | 3,54E-06 |
| Acetaldehyde                         | 1,48E-06 | 1,44E-06 | 1,29E-06 | 1,02E-06 | 1,40E-06 | 1,13E-06 | 3,22E-07 | 1,35E-06 | 1,42E-06 | 1,99E-07 | 8,58E-07 | 5,10E-07 | 5,00E-07 |
| Propionaldehyde                      | NC       |
| Butyraldehyde                        | NC       |
| Isovaleraldehyde                     | NC       |
| Valeraldehyde                        | NC       |
| Hexaldehyde                          | NC       |
| Phthalates                           |          |          |          |          |          |          |          |          |          |          |          |          |          |
| di(2-ethyl hexyl)phthalate<br>(DEHP) | 3,40E-09 | 3,61E-09 | 6,43E-09 | 6,99E-09 | 1,26E-08 | 6,95E-09 | 3,17E-09 | 3,18E-09 | 3,54E-09 | 4,14E-09 | 4,97E-09 | 3,19E-09 | 3,42E-09 |
| Diethylphthalate (DEP)               | NC       |
| Dibutylphthalate (DBP)               | NC       |
| Diisobutylphthalate (DiBP)           | NC       |
| Benzylbutylphthalate (BBP)           | NC       |
| Diisononylphthalate (DiNP)           | NC       |
| Musks                                |          |          |          |          |          |          |          |          |          |          |          |          |          |
| Tonalide (AHTN)                      | NC       |
| Galaxolide (HHCB)                    | NC       |
| Pyrethrinoïdes                       |          |          |          |          |          |          |          |          |          |          |          |          |          |
| Cyfluthrine                          | NC       |
| Cypermethrine                        | NC       |
| Deltamethrine                        | NC       |

---

|               |    |    |    |    |    |    |    |    |    |    |    |    |    |
|---------------|----|----|----|----|----|----|----|----|----|----|----|----|----|
| Permethrine   | NC |
| Tetramethrine | NC |

---

Notes: Red values indicates an excess lifetime cancer risk exceeding the acceptability threshold of  $1 \times 10^{-5}$ ; Orange values indicates an excess lifetime cancer risk exceeding  $1 \times 10^{-6}$ ; NC indicates that the excess lifetime cancer risk exceeding was not calculated due to the absence of TRV for cancer risk.
